# Supplementary material for: Longitudinal associations between German and English language competencies in Grade 9 and educational success
Source: Atypon-hosted journal article supplement (doi:10.1024/1010-0652/a000375), 2024-02-09
Supplement: 1010-0652_a000375_esm1.pdf [file 1010-0652_a000375_esm1.pdf]

## Supplementary materials

Supplementary materials for *Longitudinal associations between German and English language competencies in Grade 9 and educational success*

**Table S1.** Competence levels according to BT 2015

| German - reading  |             |                         |                         |            |
|-------------------|-------------|-------------------------|-------------------------|------------|
| Level             | Value range | HSA                     | MSA                     | Coding     |
| V                 | ≥ 660       | Optimal standard        | Optimal standard        | above III  |
| IV                | 580 to 659  | Optimal standard        | Normative standard plus | above III  |
| III               | 500 to 579  | Normative standard plus | Normative standard      | III        |
| II                | 420 to 499  | Normative standard      | Minimal standard        | II         |
| Ib                | 350 to 419  | Minimal standard        | Below minimal standard  | Ib         |
| Ia                | < 350       | Below minimal standard  | Below minimal standard  | Ia         |
| English - reading |             |                         |                         |            |
| Level             | Value range | HSA                     | MSA                     | Coding     |
| C1                | ≥ 700       | Optimal standard        | Optimal standard        | Above B1.2 |
| B2.2              | 650 to 699  | Optimal standard        | Optimal standard        | Above B1.2 |
| B2.1              | 600 to 549  | Optimal standard        | Normative standard plus | Above B1.2 |
| B1.2              | 550 to 599  | Optimal standard        | Normative standard      | B1.2       |
| B1.1              | 500 to 549  | Optimal standard        | Minimal standard        | B1.1       |
| A2.2              | 450 to 499  | Normative standard plus | Minimal standard        | A2.2       |
| A2.1              | 400 to 449  | Normative standard      | Below minimal standard  | A2.1       |
| A1.2              | 350 to 399  | Minimal standard        | Below minimal standard  | A1.2       |
| A1.1              | < 350       | Below minimal standard  | Below minimal standard  | A1.1       |

Note: Compare Stanat et al. 2016.

## Section 1 Treatment of missing values

**Table S2.** List of variables in imputation and background models

| Var ID                          | Variable                               | Source              |
|---------------------------------|----------------------------------------|---------------------|
| wle_hoeren                      | WLE German listening                   | BT 2015             |
| wle_lesen                       | WLE German reading                     | BT 2015             |
| wle_ortho                       | WLE German orthography                 | BT 2015             |
| wle_EL                          | WLE English listening                  | BT 2015             |
| wle_ER                          | WLE English reading                    | BT 2015             |
| BEFKIwle                        | Fluid intelligence - figural reasoning | BT 2015             |
| TR_geschlecht                   | Sex                                    | BT 2015             |
| trnotedeu_r_rec                 | Mid-term grade German                  | BT 2015             |
| trnoteeng_r_rec                 | Mid-term grade English                 | BT 2015             |
| trnotemat_r_rec                 | Mid-term grade Math                    | BT 2015             |
| HISEI_rec                       | Highest household ISEI                 | BT 2015             |
| zhg_rec                         | Binary migration background            | BT 2015             |
| schulform                       | School type                            | BT 2015             |
| HB_H_Abschluss_rec <sup>a</sup> | Highest recorded degree                | administrative data |
| hb_zap_g_de <sup>a</sup>        | Grade German ZAP base level            | administrative data |
| hb_zap_e_de <sup>a</sup>        | Grade German ZAP extended level        | administrative data |
| hb_zap_g_eng <sup>a</sup>       | Grade English ZAP extended level       | administrative data |
| hb_zap_e_eng <sup>a</sup>       | Grade English ZAP extended level       | administrative data |

*Note:* <sup>a</sup> Variable is not used as part of the background model for the plausible values.

**Table S3.** Missing values

|                      | <i>N</i> missing | Share missing |
|----------------------|------------------|---------------|
| Highest degree       | 23               | 0.02          |
| Grade German         | 606              | 0.43          |
| Grade English        | 610              | 0.43          |
| Sex                  | 0                | 0.00          |
| Migration background | 254              | 0.18          |
| ISEI                 | 321              | 0.23          |
| School track         | 0                | 0.00          |

*Note:* The table reports missing values as share of the sample of students for which linkage is possible and which are used during the imputation process ( $N = 1423$ ), ignoring later reduction in sample sizes.

## Section 2 Predicted probabilities

**Table S4.** Predicted probabilities highest degree

|                          | Degree    |                  |                  |                     |
|--------------------------|-----------|------------------|------------------|---------------------|
|                          | No degree | HSA <sup>1</sup> | MSA <sup>2</sup> | Abitur <sup>3</sup> |
| <b>German - reading</b>  |           |                  |                  |                     |
| Ia                       | 0.07      | 0.36             | 0.45             | 0.11                |
| Ib                       | 0.03      | 0.22             | 0.52             | 0.23                |
| II                       | 0.02      | 0.15             | 0.50             | 0.33                |
| III                      | 0.01      | 0.07             | 0.38             | 0.54                |
| above III                | 0.01      | 0.05             | 0.33             | 0.61                |
| <b>English - reading</b> |           |                  |                  |                     |
| A1.1                     | 0.12      | 0.50             | 0.34             | 0.04                |
| A1.2                     | 0.04      | 0.32             | 0.52             | 0.12                |
| A2.1                     | 0.02      | 0.19             | 0.57             | 0.22                |
| A2.2                     | 0.01      | 0.10             | 0.50             | 0.39                |
| B1.1                     | 0.01      | 0.06             | 0.41             | 0.52                |
| B1.2                     | 0.00      | 0.03             | 0.29             | 0.67                |
| Above B1.2               | 0.00      | 0.03             | 0.25             | 0.72                |

*Note:* Predicted probabilities are calculated with covariates at their means.

<sup>1</sup> lower secondary school-leaving certificate

<sup>2</sup> intermediate secondary school-leaving certificate

<sup>3</sup> general university entrance qualification

**Table S5.** Predicted probabilities highest degree

| # achieved HSA minimal standards | Degree    |                  |                  |                     |
|----------------------------------|-----------|------------------|------------------|---------------------|
|                                  | No degree | HSA <sup>1</sup> | MSA <sup>2</sup> | Abitur <sup>3</sup> |
| 0                                | 0.16      | 0.52             | 0.27             | 0.05                |
| 1                                | 0.11      | 0.47             | 0.35             | 0.07                |
| 2                                | 0.04      | 0.27             | 0.50             | 0.19                |
| 3                                | 0.01      | 0.11             | 0.45             | 0.43                |

*Note:* Predicted probabilities are calculated with covariates at their means.

<sup>1</sup> lower secondary school-leaving certificate

<sup>2</sup> intermediate secondary school-leaving certificate

<sup>3</sup> general university entrance qualification

**Table S6.** Predicted probabilities ZAP grades

|                         | Grade |      |      |      |      |
|-------------------------|-------|------|------|------|------|
|                         | 1     | 2    | 3    | 4    | 5/6  |
| <b>German - reading</b> |       |      |      |      |      |
| Ia                      | 0.02  | 0.22 | 0.47 | 0.24 | 0.05 |
| Ib                      | 0.04  | 0.31 | 0.45 | 0.17 | 0.03 |
| II                      | 0.07  | 0.41 | 0.40 | 0.11 | 0.02 |
| III                     | 0.12  | 0.51 | 0.30 | 0.06 | 0.01 |
| above III               | 0.14  | 0.53 | 0.27 | 0.05 | 0.01 |
| <b>German - reading</b> |       |      |      |      |      |
| A1.1                    | 0.01  | 0.08 | 0.32 | 0.43 | 0.16 |
| A1.2                    | 0.04  | 0.24 | 0.45 | 0.23 | 0.05 |
| A2.1                    | 0.08  | 0.37 | 0.40 | 0.13 | 0.02 |
| A2.2                    | 0.15  | 0.48 | 0.29 | 0.07 | 0.01 |
| B1.1                    | 0.41  | 0.45 | 0.11 | 0.02 | 0.00 |
| B1.2                    | 0.52  | 0.39 | 0.08 | 0.01 | 0.00 |
| Above B1.2              | 0.88  | 0.11 | 0.01 | 0.00 | 0.00 |

*Note:* Predicted probabilities are calculated with covariates as observed; grades are language specific grades.

### Section 3 Parallel regression assumption

The proportional odds or parallel regression assumption for ordered logistic or ordered probit regressions demands that, at a given probability level, a one unit increase in a variable leads to the same increase or decrease of the probability of observing a specific outcome for each of the possible outcome categories. One way to deal with violations of the assumption is to use partial proportional odds models instead, which allow certain parameters to vary and assume parallel regression lines for the others:

$$P(Y_i > j) = \frac{\exp(\alpha_j + x_{1j}\beta_1 + x_{2i}\beta_2 + x_{3i}\beta_{3j})}{1 + \exp(\alpha_j + x_{1j}\beta_1 + x_{2i}\beta_2 + x_{3i}\beta_{3j})}.$$

In this case, the coefficients for variables  $x_1$  and  $x_2$  are constrained across the outcome categories, while coefficients for variable  $x_3$  are allowed to vary (for example Williams, 2006; Yee, 2010).

We conducted Wald tests to assess the parallel regression assumption. We implemented the tests for the unadjusted models with our main variables of interest using the first imputed dataset and survey weights. In case of German reading, we find no indication, that the assumption is violated for the model with our primary outcome, highest degree ( $F(8, 53) = 1.22$ , p-value = 0.37). In all other models we find indications that the parallel regression assumption is violated for at least one coefficient. In order to assess the consequences of the violation for our main models, we re-estimated them using partial proportional odds models. In case of English grades as the dependent variable, this was only possible when further reducing categories on the competence levels due to empty cells. A comparison of the empty models between ordered logistic regressions and partial proportional odds models showed that despite minor changes in the predicted probabilities, the overall conclusions are not affected and the focus on the better known, simpler models seems justified.

## Section 4 Results for additional domains

**Table S7.** Results from ordered logistic regression of highest degree on alternative domains - proficiency levels

|                            | German     |      |          |      | German     |      |          |      | English    |      |          |      |
|----------------------------|------------|------|----------|------|------------|------|----------|------|------------|------|----------|------|
|                            | Unadjusted |      | Adjusted |      | Unadjusted |      | Adjusted |      | Unadjusted |      | Adjusted |      |
|                            | $\beta$    | SE   | $\beta$  | SE   | $\beta$    | SE   | $\beta$  | SE   | $\beta$    | SE   | $\beta$  | SE   |
| <b>Proficiency levels</b>  |            |      |          |      |            |      |          |      |            |      |          |      |
| German - listening         |            |      |          |      |            |      |          |      |            |      |          |      |
| Ib                         | 1.22*      | 0.31 | 1.11*    | 0.30 |            |      |          |      |            |      |          |      |
| II                         | 1.64*      | 0.31 | 1.34*    | 0.33 |            |      |          |      |            |      |          |      |
| III                        | 2.52*      | 0.33 | 1.90*    | 0.33 |            |      |          |      |            |      |          |      |
| Above III                  | 3.16*      | 0.36 | 2.21*    | 0.35 |            |      |          |      |            |      |          |      |
| German - orthography       |            |      |          |      |            |      |          |      |            |      |          |      |
| Ib                         |            |      |          |      | 0.86*      | 0.29 | 0.75*    | 0.28 |            |      |          |      |
| II                         |            |      |          |      | 1.71*      | 0.29 | 1.50*    | 0.30 |            |      |          |      |
| III                        |            |      |          |      | 2.92*      | 0.33 | 2.42*    | 0.33 |            |      |          |      |
| Above III                  |            |      |          |      | 4.49*      | 0.32 | 3.51*    | 0.37 |            |      |          |      |
| English - listening        |            |      |          |      |            |      |          |      |            |      |          |      |
| A1.2                       |            |      |          |      |            |      |          |      | 1.43*      | 0.39 | 1.37*    | 0.40 |
| A2.1                       |            |      |          |      |            |      |          |      | 2.31*      | 0.35 | 2.20*    | 0.37 |
| A2.2                       |            |      |          |      |            |      |          |      | 3.61*      | 0.32 | 3.39*    | 0.34 |
| B1.1                       |            |      |          |      |            |      |          |      | 4.45*      | 0.38 | 4.12*    | 0.37 |
| B1.2                       |            |      |          |      |            |      |          |      | 5.67*      | 0.46 | 5.03*    | 0.43 |
| Above B1.2                 |            |      |          |      |            |      |          |      | 6.54*      | 0.47 | 5.72*    | 0.47 |
| <b>Controls</b>            |            |      |          |      |            |      |          |      |            |      |          |      |
| ISEI                       |            |      | 0.03*    | 0.00 |            |      | 0.02*    | 0.00 |            |      | 0.01*    | 0.00 |
| Sex - female               |            |      | 0.37*    | 0.15 |            |      | 0.12     | 0.17 |            |      | 0.48*    | 0.15 |
| Migration background - yes |            |      | -0.15    | 0.15 |            |      | -0.15    | 0.12 |            |      | -0.59*   | 0.16 |
| Multi-track school         |            |      | -0.22    | 0.37 |            |      | -0.19    | 0.26 |            |      | -0.24    | 0.29 |
| Academic track school      |            |      | 1.65*    | 0.41 |            |      | 1.00*    | 0.40 |            |      | 0.78     | 0.41 |
| Pseudo- $R^2$              | 0.09       |      | 0.18     |      | 0.19       |      | 0.23     |      | 0.24       |      | 0.28     |      |
| $\Delta$ Pseudo- $R^2$     |            |      | 0.09     |      |            |      | 0.04     |      |            |      | 0.04     |      |
| N                          | 1183       |      | 1183     |      | 1183       |      | 1183     |      | 1183       |      | 1183     |      |

Notes: reference categories: proficiency levels German = Ia, proficiency levels English = A1.1, sex = male, migration background = no, school type = comprehensive school; reported coefficients are on log-odds scale; results are based on  $m = 15$  imputed datasets; McFadden Pseudo- $R^2$  is calculated as the average of all Pseudo- $R^2$ 's across the 15 imputations assuming independence between the observations in the sample.

\* $p < 0.05$  (two tailed tests).

**Table S8.** Results from ordered logistic regression of highest degree on alternative domains - continuous scores

|                            | German     |      |          |      | German     |      |          |      | English    |      |          |      |
|----------------------------|------------|------|----------|------|------------|------|----------|------|------------|------|----------|------|
|                            | Unadjusted |      | Adjusted |      | Unadjusted |      | Adjusted |      | Unadjusted |      | Adjusted |      |
|                            | $\beta$    | SE   | $\beta$  | SE   | $\beta$    | SE   | $\beta$  | SE   | $\beta$    | SE   | $\beta$  | SE   |
| <b>Proficiency score</b>   |            |      |          |      |            |      |          |      |            |      |          |      |
| German - listening         |            |      |          |      |            |      |          |      |            |      |          |      |
|                            | 0.01*      | 0.00 | 0.01*    | 0.00 |            |      |          |      |            |      |          |      |
| German - orthography       |            |      |          |      |            |      |          |      |            |      |          |      |
|                            |            |      |          |      | 0.01*      | 0.00 | 0.01*    | 0.00 |            |      |          |      |
| English - listening        |            |      |          |      |            |      |          |      |            |      |          |      |
|                            |            |      |          |      |            |      |          |      | 0.02*      | 0.00 | 0.01*    | 0.00 |
| <b>Controls</b>            |            |      |          |      |            |      |          |      |            |      |          |      |
| ISEI                       |            |      | 0.03*    | 0.00 |            |      | 0.02*    | 0.00 |            |      | 0.01*    | 0.00 |
| Sex - female               |            |      | 0.36*    | 0.15 |            |      | 0.10     | 0.17 |            |      | 0.48*    | 0.14 |
| Migration background - yes |            |      | -0.14    | 0.15 |            |      | -0.20    | 0.13 |            |      | -0.60*   | 0.16 |
| Multi-track school         |            |      | -0.26    | 0.38 |            |      | -0.22    | 0.27 |            |      | -0.25    | 0.28 |
| Academic track             |            |      | 1.62*    | 0.41 |            |      | 1.04*    | 0.39 |            |      | 0.65     | 0.39 |
| Pseudo- $R^2$              | 0.09       |      | 0.18     |      | 0.18       |      | 0.22     |      | 0.25       |      | 0.28     |      |
| $\Delta$ Pseudo- $R^2$     |            |      | 0.09     |      |            |      | 0.04     |      |            |      | 0.03     |      |
| N                          | 1183       |      | 1183     |      | 1183       |      | 1183     |      | 1183       |      | 1183     |      |

Notes: reference categories: sex = male, migration background = no, school type = comprehensive school; reported coefficients are on log-odds scale; results are based on  $m = 15$  imputed datasets; McFadden Pseudo- $R^2$  is calculated as the average of all Pseudo- $R^2$ 's across the 15 imputations assuming independence between the observations in the sample.

\* $p < 0.05$  (two tailed tests).

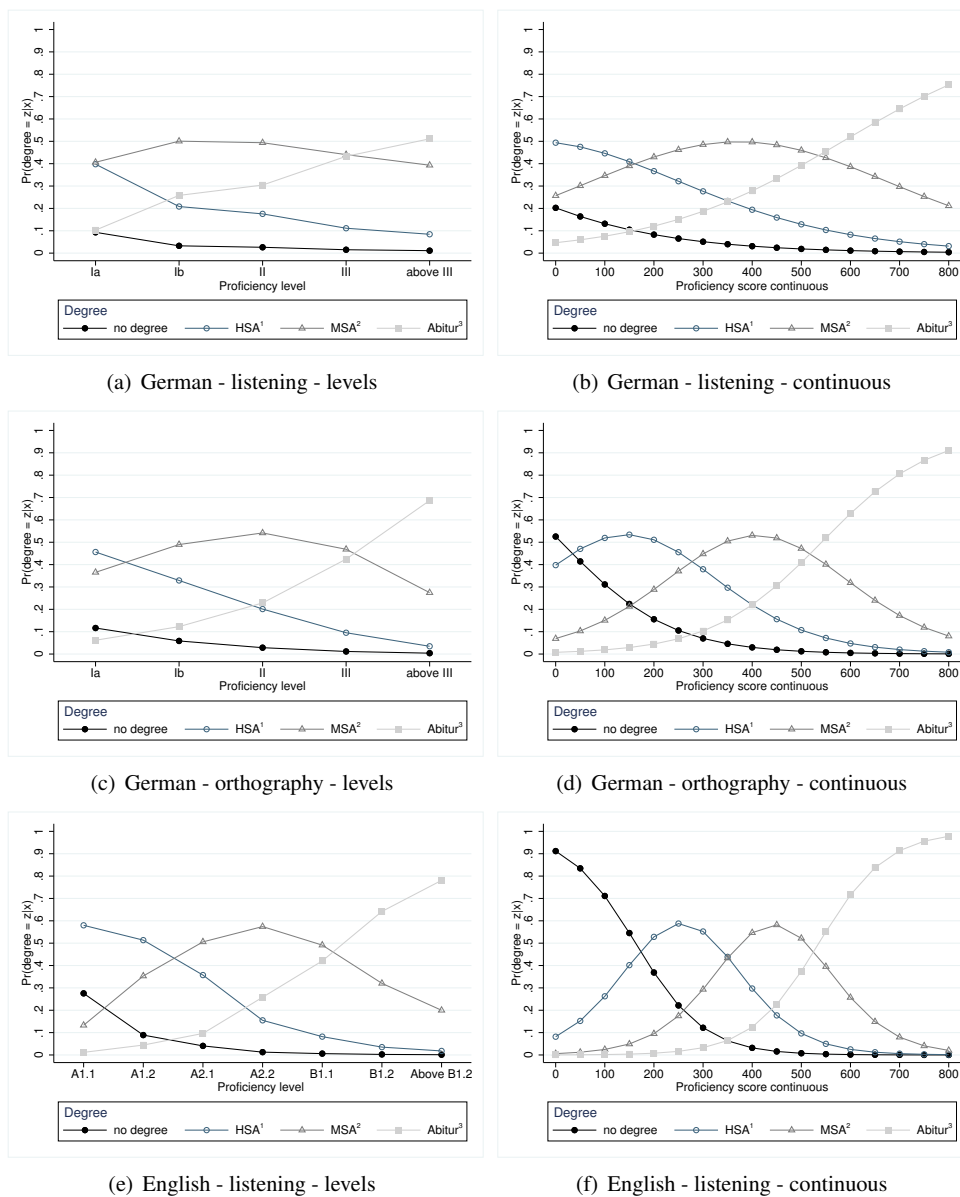

**Figure S1.** Predicted probabilities of achieving a specific degree conditional on the alternative domains (German listening, German orthography and English listening) from adjusted models, controlling for sex, migration background, household socio-economic status, and school track.

- <sup>1</sup> lower secondary school-leaving certificate  
<sup>2</sup> intermediate secondary school-leaving certificate  
<sup>3</sup> general university entrance qualification

**Table S9.** Results from ordered logistic regressions of grades on alternative domains - proficiency levels

|                            | Grade German |      |          |      | Grade German |      |          |      | Grade English |      |          |      |
|----------------------------|--------------|------|----------|------|--------------|------|----------|------|---------------|------|----------|------|
|                            | Unadjusted   |      | Adjusted |      | Unadjusted   |      | Adjusted |      | Unadjusted    |      | Adjusted |      |
|                            | $\beta$      | SE   | $\beta$  | SE   | $\beta$      | SE   | $\beta$  | SE   | $\beta$       | SE   | $\beta$  | SE   |
| <b>Proficiency levels</b>  |              |      |          |      |              |      |          |      |               |      |          |      |
| German - listening         |              |      |          |      |              |      |          |      |               |      |          |      |
| Ib                         | -0.24        | 0.37 | -0.14    | 0.34 |              |      |          |      |               |      |          |      |
| II                         | -0.66*       | 0.27 | -0.47    | 0.25 |              |      |          |      |               |      |          |      |
| III                        | -0.84*       | 0.31 | -0.58    | 0.29 |              |      |          |      |               |      |          |      |
| Above III                  | -1.56*       | 0.33 | -1.24*   | 0.30 |              |      |          |      |               |      |          |      |
| German - orthography       |              |      |          |      |              |      |          |      |               |      |          |      |
| Ib                         |              |      |          |      | -0.68        | 0.36 | -0.62    | 0.34 |               |      |          |      |
| II                         |              |      |          |      | -1.16*       | 0.32 | -1.03*   | 0.32 |               |      |          |      |
| III                        |              |      |          |      | -1.77*       | 0.36 | -1.56*   | 0.36 |               |      |          |      |
| Above III                  |              |      |          |      | -2.85*       | 0.43 | -2.55*   | 0.42 |               |      |          |      |
| English - listening        |              |      |          |      |              |      |          |      |               |      |          |      |
| A1.2                       |              |      |          |      |              |      |          |      | -1.31*        | 0.53 | -1.31*   | 0.53 |
| A2.1                       |              |      |          |      |              |      |          |      | -2.55*        | 0.55 | -2.53*   | 0.55 |
| A2.2                       |              |      |          |      |              |      |          |      | -4.12*        | 0.50 | -4.10*   | 0.51 |
| B1.1                       |              |      |          |      |              |      |          |      | -5.39*        | 0.52 | -5.39*   | 0.53 |
| B1.2                       |              |      |          |      |              |      |          |      | -6.56*        | 0.57 | -6.61*   | 0.57 |
| Above B1.2                 |              |      |          |      |              |      |          |      | -7.87*        | 0.83 | -7.85*   | 0.87 |
| <b>Controls</b>            |              |      |          |      |              |      |          |      |               |      |          |      |
| ISEI                       |              |      | -0.01*   | 0.00 |              |      | -0.01    | 0.00 |               |      | -0.00    | 0.00 |
| Sex - female               |              |      | -0.82*   | 0.19 |              |      | -0.68*   | 0.20 |               |      | -0.02    | 0.19 |
| Migration background - yes |              |      | 0.21     | 0.15 |              |      | 0.20     | 0.17 |               |      | 0.26     | 0.18 |
| Multi-track school         |              |      | -0.59*   | 0.25 |              |      | -0.67*   | 0.31 |               |      | 0.07     | 0.30 |
| Academic track school      |              |      | -0.21    | 0.23 |              |      | -0.01    | 0.23 |               |      | 0.44     | 0.26 |
| Pseudo- $R^2$              | 0.03         |      | 0.05     |      | 0.06         |      | 0.08     |      | 0.23          |      | 0.23     |      |
| $\Delta$ Pseudo- $R^2$     |              |      | 0.03     |      |              |      | 0.02     |      |               |      | 0.00     |      |
| N                          | 735          |      | 735      |      | 735          |      | 735      |      | 707           |      | 707      |      |

Notes: reference categories: proficiency levels German = Ia, proficiency levels English = A1.1, sex = male, migration background = no, school type = comprehensive school; reported coefficients are on log-odds scale; results are based on  $m = 15$  imputed datasets; McFadden Pseudo- $R^2$  is calculated as the average of all Pseudo- $R^2$ 's across the 15 imputations assuming independence between the observations in the sample.  
\* $p < 0.05$  (two tailed tests).

**Table S10.** Results from ordered logistic regressions of grades on alternative domains - continuous scores

|                            | Grade German |      |          |      | Grade German |      |          |      | Grade English |      |          |      |
|----------------------------|--------------|------|----------|------|--------------|------|----------|------|---------------|------|----------|------|
|                            | Unadjusted   |      | Adjusted |      | Unadjusted   |      | Adjusted |      | Unadjusted    |      | Adjusted |      |
|                            | $\beta$      | SE   | $\beta$  | SE   | $\beta$      | SE   | $\beta$  | SE   | $\beta$       | SE   | $\beta$  | SE   |
| <b>Proficiency score</b>   |              |      |          |      |              |      |          |      |               |      |          |      |
| German - listening         |              |      |          |      |              |      |          |      |               |      |          |      |
|                            | -0.00*       | 0.00 | -0.00*   | 0.00 |              |      |          |      |               |      |          |      |
| German - orthography       |              |      |          |      |              |      |          |      |               |      |          |      |
|                            |              |      |          |      | -0.01*       | 0.00 | -0.01*   | 0.00 |               |      |          |      |
| English - listening        |              |      |          |      |              |      |          |      |               |      |          |      |
|                            |              |      |          |      |              |      |          |      | -0.02*        | 0.00 | -0.02*   | 0.00 |
| <b>Controls</b>            |              |      |          |      |              |      |          |      |               |      |          |      |
| ISEI                       |              |      | -0.01*   | 0.00 |              |      | -0.01    | 0.01 |               |      | -0.00    | 0.00 |
| Sex - female               |              |      | -0.81*   | 0.18 |              |      | -0.65*   | 0.19 |               |      | -0.02    | 0.19 |
| Migration background - yes |              |      | 0.19     | 0.15 |              |      | 0.20     | 0.17 |               |      | 0.27     | 0.18 |
| Multi-track school         |              |      | -0.60*   | 0.26 |              |      | -0.68*   | 0.31 |               |      | 0.11     | 0.29 |
| Academic track school      |              |      | -0.20    | 0.23 |              |      | 0.06     | 0.23 |               |      | 0.54     | 0.28 |
| Pseudo- $R^2$              | 0.02         |      | 0.05     |      | 0.06         |      | 0.08     |      | 0.24          |      | 0.25     |      |
| $\Delta$ Pseudo- $R^2$     |              |      | 0.03     |      |              |      | 0.02     |      |               |      | 0.00     |      |
| N                          | 735          |      | 735      |      | 735          |      | 735      |      | 707           |      | 707      |      |

Notes: reference categories: sex = male, migration background = no; school type = comprehensive school; reported coefficients are on log-odds scale; results are based on  $m = 15$  imputed datasets; McFadden Pseudo- $R^2$  is calculated as the average of all Pseudo- $R^2$ 's across the 15 imputations assuming independence between the observations in the sample.  
\* $p < 0.05$  (two tailed tests).



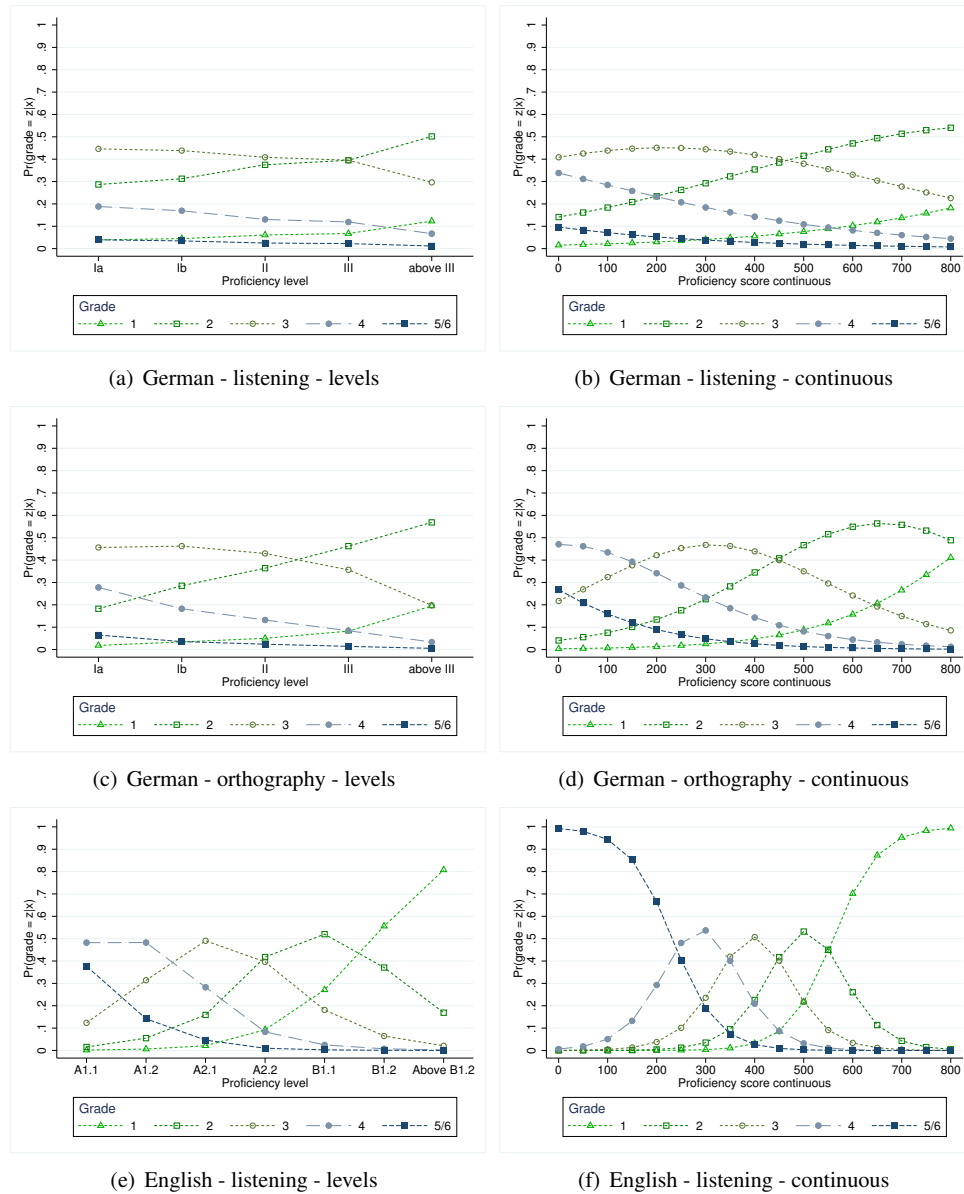

**Figure S2.** Predicted probabilities of achieving different grade in specific language conditional on the alternative domains (German listening, German orthography and English listening) from adjusted models, controlling for sex, migration background, household socio-economic status, and school track.
